# Supplementary material
Source: PubMed Central journal article supplement (PMC4551048)
Supplement: supp_mol.115.099176_Supplemental_99176.pdf [file supp_mol.115.099176_Supplemental_99176.pdf]

Supplemental data

**Structure-function Basis of Attenuated Inverse Agonism of ARBs  
for Active-state AT1 Receptor**

Takanobu Takezako, Hamiyet Unal, Sadashiva S Karnik and Koichi Node

Molecular Pharmacology

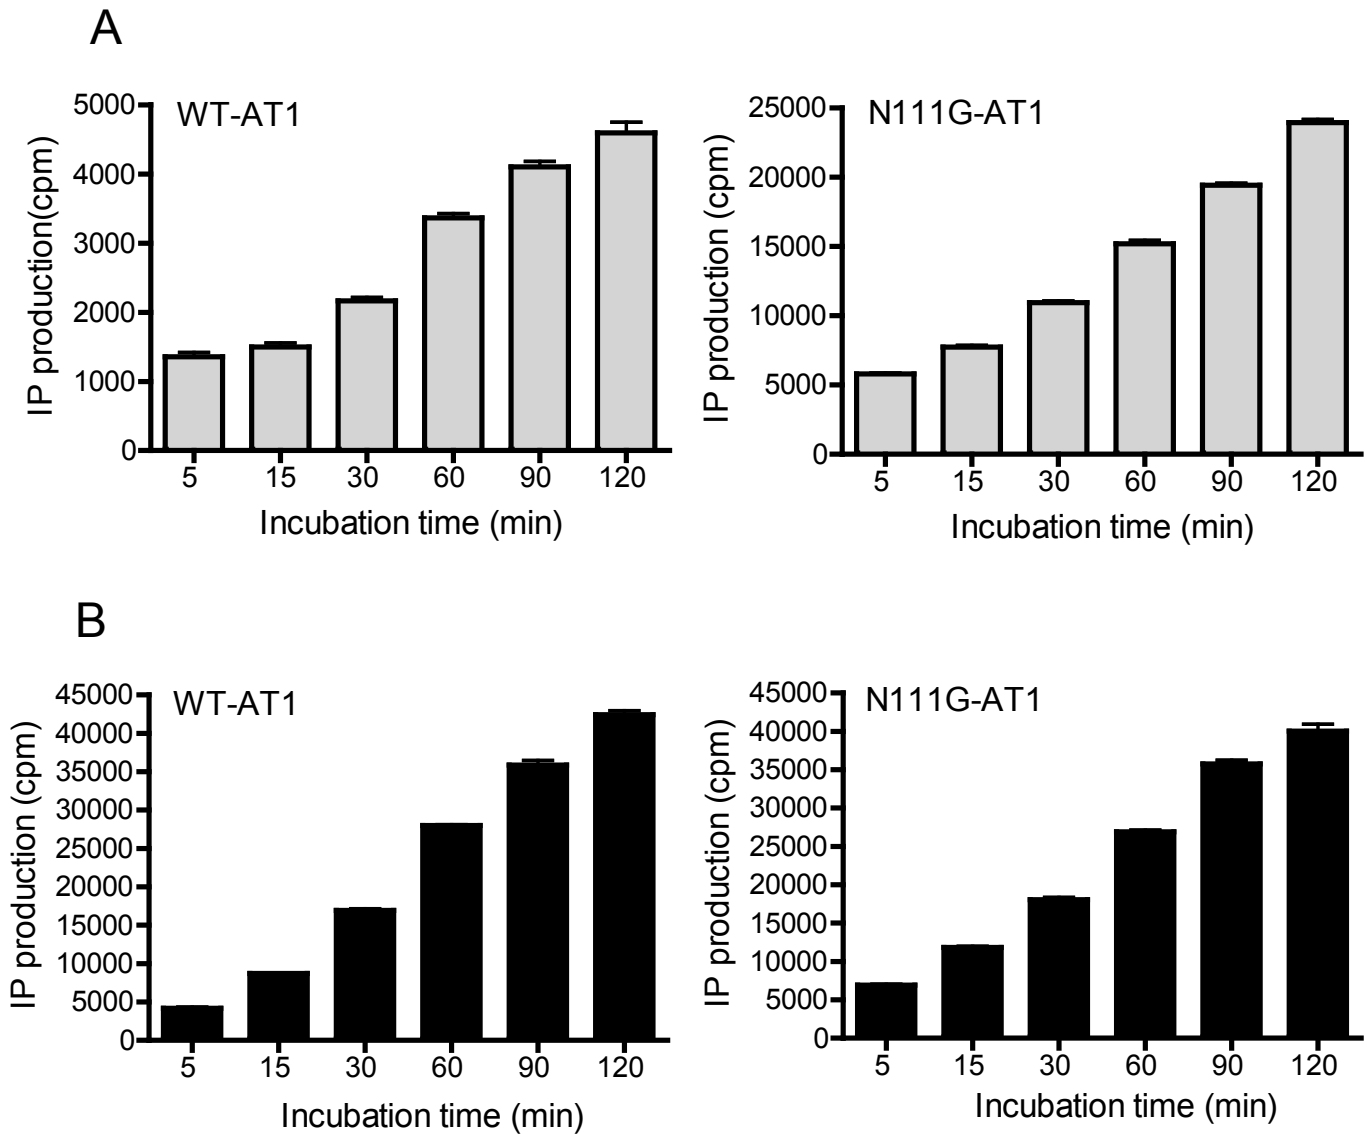

Supplemental Figure 1. Time-dependent increment of the constitutive (A) and Ang II- (B) stimulated IP production in WT-AT1 and N111G-AT1. COS1 cells transfected with WT-AT1 and N111G-AT1 were incubated with vehicle or 1  $\mu$ M Ang II in the presence of 10 mM LiCl for various time intervals between 5 and 120 minutes at 37°C. The IP production was evaluated as indicated under “Materials and Methods.” The constitutive and Ang II-stimulated IP production was increased in a linear fashion as the incubation period increased in both WT-AT1 and N111G-AT1, reaching the highest IP value after a 120-minute incubation period.

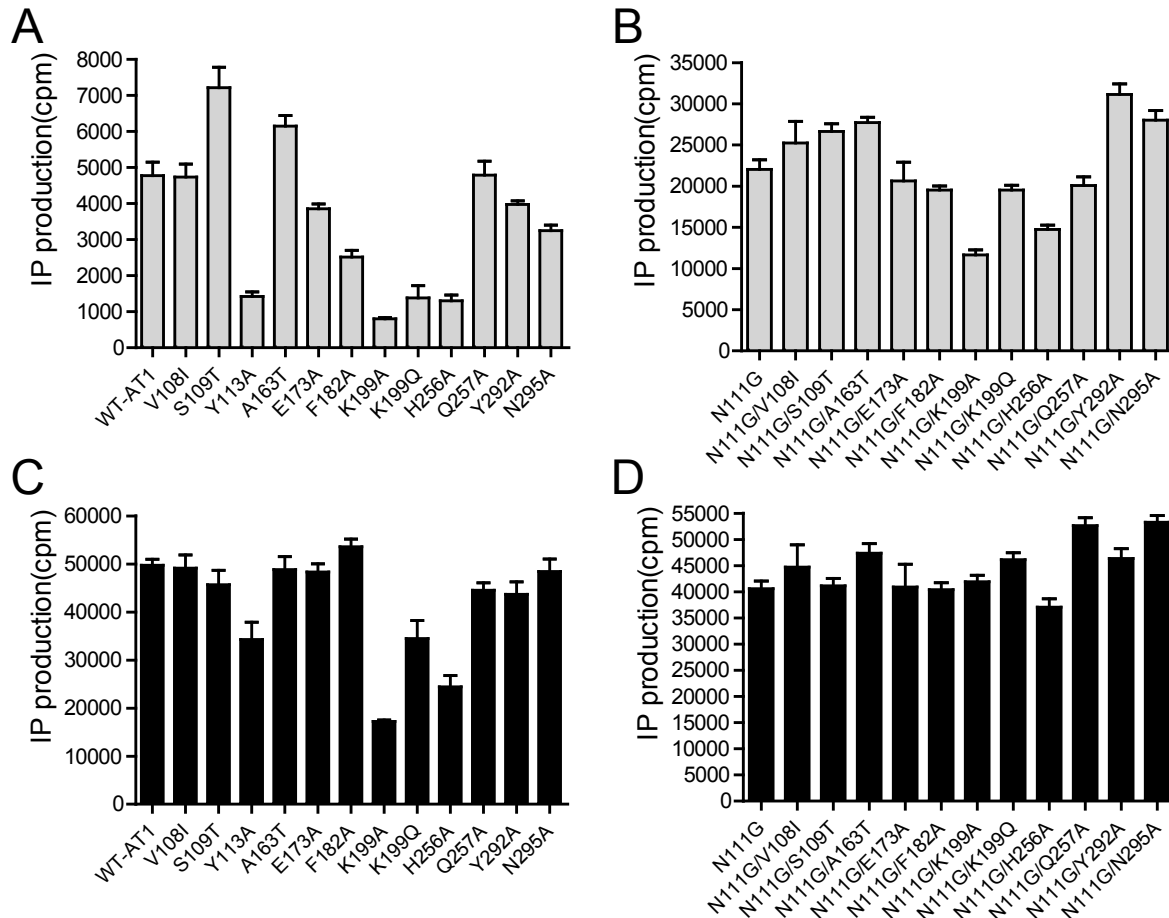

Supplemental Figure 2. Functional analysis of single mutants in the WT-BG and N111G-BG. The constitutive (A, B) and Ang II- (C, D) stimulated IP production of the single mutants in WT-BG and N111G-BG is shown. COS1 cells transfected with mutants in either WT-BG or N111G-BG were incubated with vehicle or 1  $\mu$ M Ang II in the presence of 10 mM LiCl for 120 minutes at 37°C. The IP production was evaluated as indicated under “Materials and Methods.”

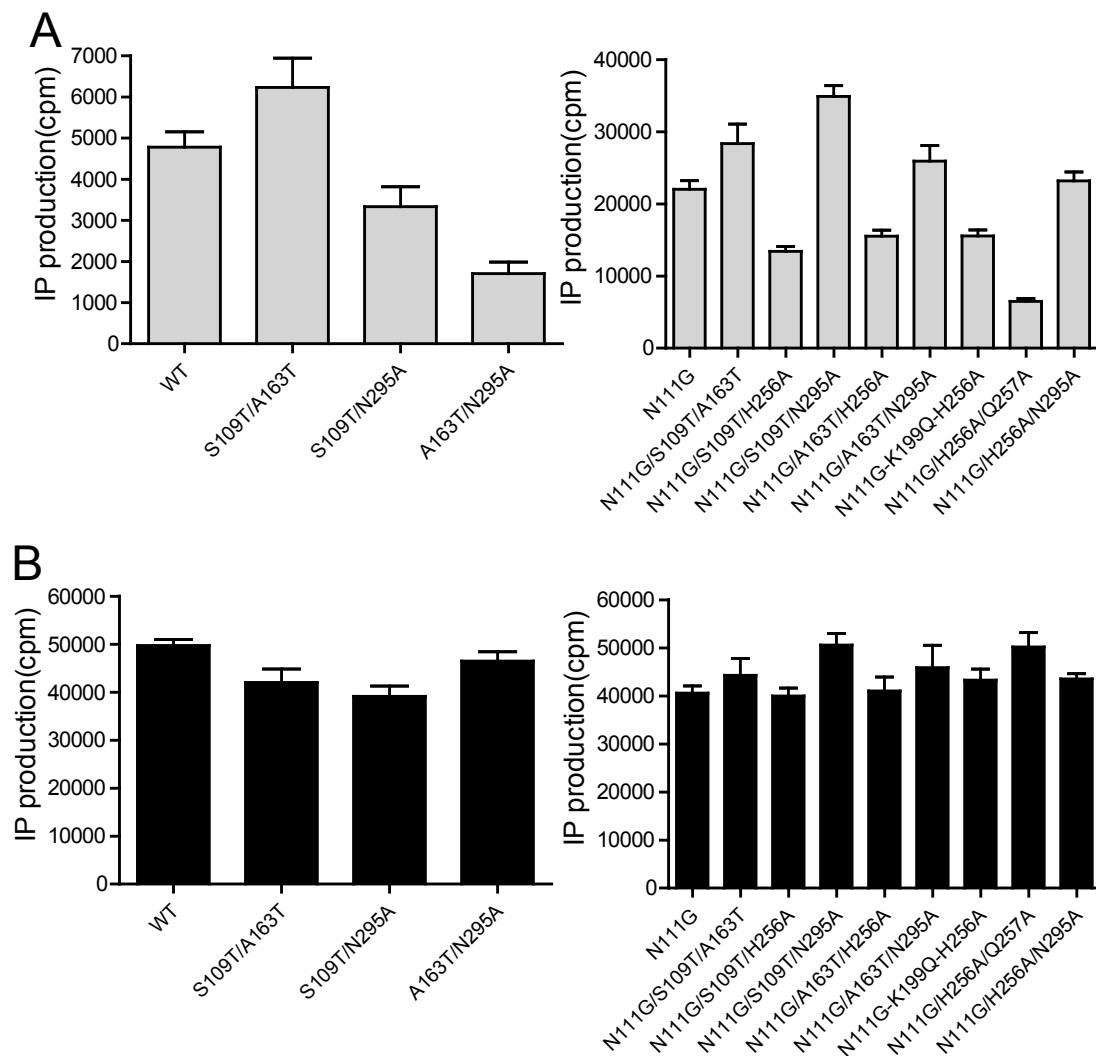

Supplemental Figure 3. Functional analysis of double mutants in WT-BG and N111G-BG.

The constitutive (A) and Ang II- (B) stimulated IP production of the double mutants in WT-BG and N111G-BG is shown. COS1 cells transfected with mutants in either WT-BG or N111G-BG were incubated with vehicle or 1  $\mu$ M Ang II in the presence of 10 mM LiCl for 120 minutes at 37°C. The IP production was evaluated as indicated under “Materials and Methods.”
